# Supplementary material for: Extensive Within-Host Diversity in Fecally Carried Extended-Spectrum-Beta-Lactamase-Producing Escherichia coli Isolates: Implications for Transmission Analyses
Source: PubMed Central journal article supplement (PMC4473215; doi:10.1128/jcm.00378-15), 2015-06-18

1 **Supplementary Figure 1. Genetic characteristics of *Escherichia coli* carriage**  
2 **isolates from A. subject IHD813; B. subject IHD1178; C. subject IHD717.**  
3 Black circles at tree nodes indicate bootstrap values of > 95%. Colored circles  
4 represent genetic similarity of isolates within STs, and are sized and labeled  
5 according to the number of isolates sharing identity. Branches between circles  
6 represent a core, single nucleotide variant. Labels adjacent to circles represent  
7 *bla*<sub>CTX-M</sub> variants (colored by variant type). Within-host resistance and virulence  
8 gene profiles for all isolates in this individual are represented in the heatmap at the  
9 bottom of each panel, with colored blocks representing presence, and gray blocks  
10 absence of a gene. Resistance genes are represented as red blocks; virulence  
11 factors are colored by functional category (sea-green = adhesins; olive = toxins;  
12 light blue = nutritional factors; dark blue = immune evasion; lilac =  
13 miscellaneous). Isolates from within the cefpodoxime zones are labelled \_1-8;  
14 from outside the zones \_9-16, where applicable.





- Subject IHD717**
- 16 isolates
  - 5 STs
  - No CTX-M/ESBL positive isolates

- *Within-host diversity*
- Core variable sites = 70,933

3,100 SNVs

11,315 SNVs

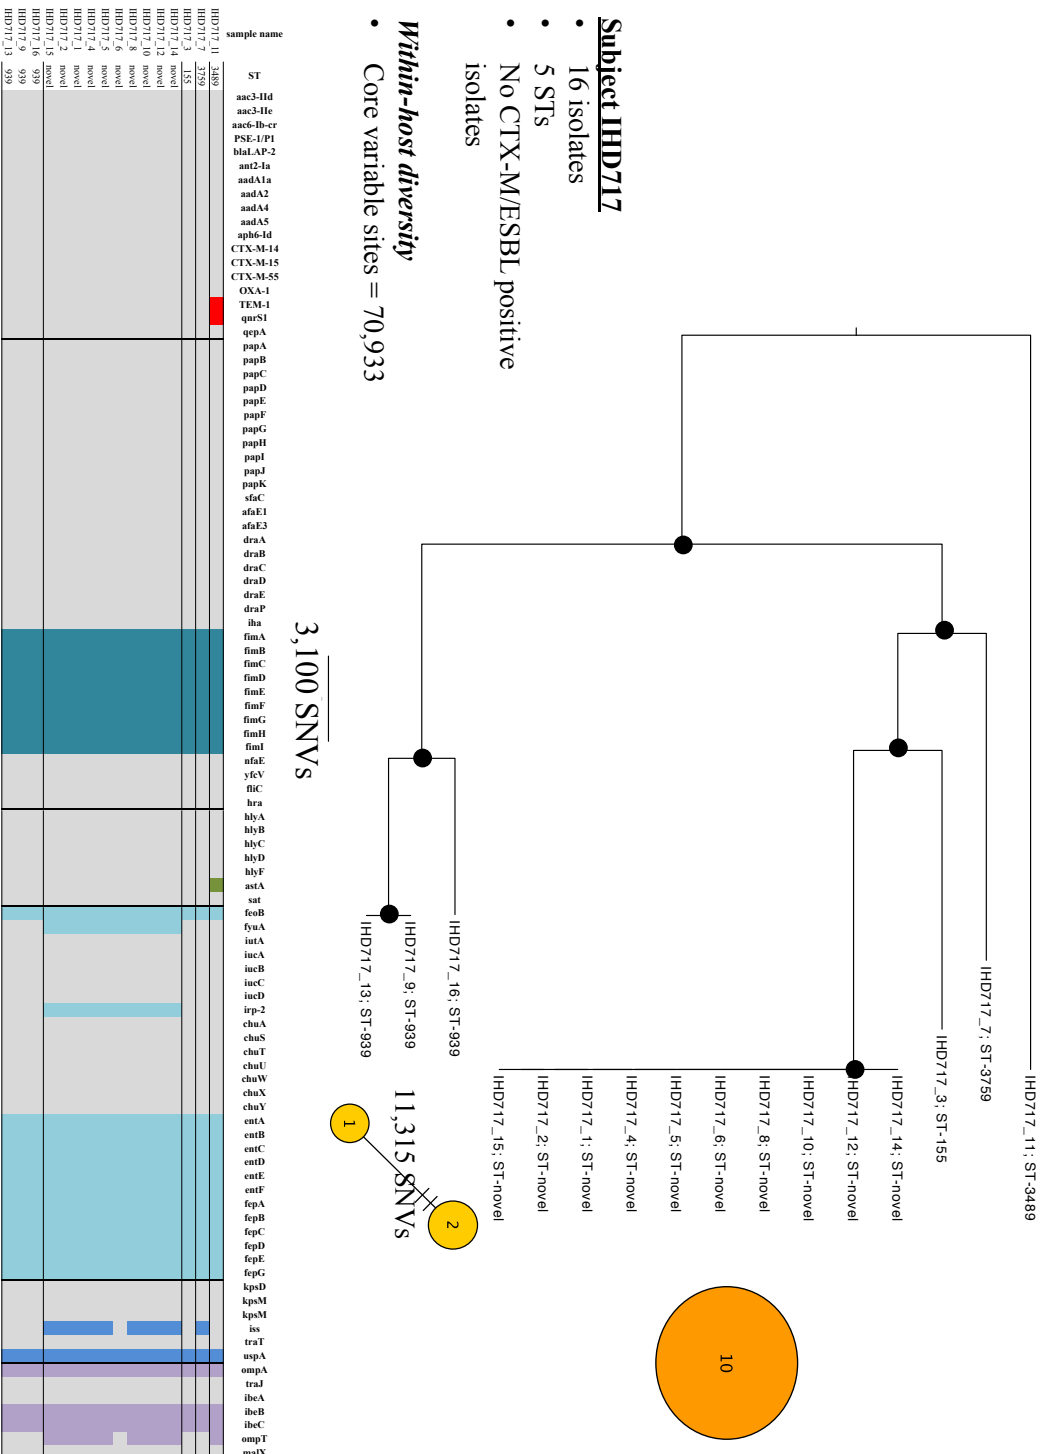

Supplement: JCM.00378-15_zjm999094325so1.pdf [file JCM.00378-15_zjm999094325so1.pdf]
